# Supplementary material for: 2,2′-Bipyridyl-1,1′-dioxide based bismuth(iii) bromide hybrids: studies on crystal structure and luminescence
Source: Royal Society of Chemistry journal article supplement (doi:10.1039/d1ce00362c), 2021-01-01
Supplement: d1ce00362c1.pdf [file d1ce00362c1.pdf]

Supporting Information

**2,2'-bipyridyl-1,1'-dioxide based bismuth (III) bromide hybrids:  
studies on crystal structure and luminescence**

Jian-Ce Jin,<sup>a,b</sup> Yang-Peng Lin,<sup>c</sup> Li-Fang Lin,<sup>a,b</sup> Cao Xiao,<sup>a,b</sup> Ying Song,<sup>d</sup> Nan-Nan Shen,<sup>a</sup> Liao-Kuo Gong,<sup>a</sup> Zhi-Zhuan Zhang,<sup>a,c</sup> Ke-Zhao Du,<sup>c</sup> and Xiao-Ying Huang\*<sup>a</sup>

<sup>a</sup>State Key Laboratory of Structure Chemistry, Fujian Institute of Research on the Structure of Matter, Chinese Academy of Sciences, Fuzhou 350002, China.

<sup>b</sup>University of Chinese Academy of Sciences, Beijing, 100049, China.

<sup>c</sup>College of Chemistry and Materials Science, Fujian Provincial Key Laboratory of Polymer Materials, Fujian Normal University, 32 Shangsang Road, Fuzhou 350007, China.

<sup>d</sup>College of Chemistry and Materials, Nanning Normal University, Nanning, 530001, China.

E-mail: [xyhuang@fjirsm.ac.cn](mailto:xyhuang@fjirsm.ac.cn)

**Table S1** Crystallographic data for compound **1**, **2** and **3**.

| Compound                                                                      | <b>1</b>                                                                                      | <b>2</b>                                                                                          | <b>3</b>                                                                        |
|-------------------------------------------------------------------------------|-----------------------------------------------------------------------------------------------|---------------------------------------------------------------------------------------------------|---------------------------------------------------------------------------------|
| Empirical formula                                                             | Bi <sub>2</sub> Br <sub>6</sub> C <sub>20</sub> H <sub>16</sub> N <sub>4</sub> O <sub>4</sub> | Bi <sub>2</sub> Br <sub>6</sub> C <sub>21</sub> H <sub>17.5</sub> N <sub>4.5</sub> O <sub>4</sub> | BiBr <sub>4</sub> C <sub>20</sub> H <sub>30</sub> N <sub>3</sub> O <sub>2</sub> |
| Formula Mass                                                                  | 1273.79                                                                                       | 1294.31                                                                                           | 873.09                                                                          |
| Crystal system                                                                | Triclinic                                                                                     | Monoclinic                                                                                        | Monoclinic                                                                      |
| Space group                                                                   | <i>P</i> -1                                                                                   | <i>C</i> 2/ <i>c</i>                                                                              | <i>P</i> 2 <sub>1</sub> / <i>c</i>                                              |
| <i>a</i> /Å                                                                   | 9.5836(5)                                                                                     | 16.702(3)                                                                                         | 16.7831(7)                                                                      |
| <i>b</i> /Å                                                                   | 9.5888(5)                                                                                     | 13.373(3)                                                                                         | 10.2718(5)                                                                      |
| <i>c</i> /Å                                                                   | 10.0923(6)                                                                                    | 27.508(6)                                                                                         | 15.2355(7)                                                                      |
| <i>α</i> /°                                                                   | 67.643(6)                                                                                     | 90                                                                                                | 90                                                                              |
| <i>β</i> /°                                                                   | 88.319(5)                                                                                     | 98.96(3)                                                                                          | 94.446(4)                                                                       |
| <i>γ</i> /°                                                                   | 61.421(5)                                                                                     | 90                                                                                                | 90                                                                              |
| <i>V</i> /Å <sup>3</sup>                                                      | 739.79(8)                                                                                     | 6069(2)                                                                                           | 2618.6(2)                                                                       |
| <i>Z</i>                                                                      | 1                                                                                             | 8                                                                                                 | 4                                                                               |
| <i>T</i> /K                                                                   | 100(2)                                                                                        | 150(2)                                                                                            | 100(2)                                                                          |
| <i>λ</i> /Å                                                                   | 0.71073                                                                                       | 0.71073                                                                                           | 0.71073                                                                         |
| <i>F</i> (000)                                                                | 572                                                                                           | 4664                                                                                              | 1640                                                                            |
| <i>ρ</i> <sub>calcd</sub> /g cm <sup>-3</sup>                                 | 2.859                                                                                         | 2.833                                                                                             | 2.215                                                                           |
| <i>μ</i> /mm <sup>-1</sup>                                                    | 20.012                                                                                        | 19.519                                                                                            | 12.858                                                                          |
| Measured refls.                                                               | 13912                                                                                         | 22722                                                                                             | 25174                                                                           |
| Independent refls.                                                            | 2617                                                                                          | 5783                                                                                              | 4624                                                                            |
| No. of parameters                                                             | 164                                                                                           | 354                                                                                               | 274                                                                             |
| <i>R</i> <sub>int</sub>                                                       | 0.0878                                                                                        | 0.0545                                                                                            | 0.0685                                                                          |
| <i>R</i> <sub>1</sub> ( <i>I</i> > 2σ( <i>I</i> )) <sup>a</sup>               | 0.0290                                                                                        | 0.0295                                                                                            | 0.0316                                                                          |
| <i>wR</i> ( <i>F</i> <sup>2</sup> ) ( <i>I</i> > 2σ( <i>I</i> )) <sup>b</sup> | 0.0570                                                                                        | 0.0666                                                                                            | 0.0649                                                                          |
| GOF                                                                           | 1.031                                                                                         | 1.037                                                                                             | 1.016                                                                           |

$$[a] R_1 = \sum \|F_o\| - \|F_c\| / \sum \|F_o\|, [b] wR_2 = [\sum w(F_o^2 - F_c^2)^2 / \sum w(F_o^2)^2]^{1/2}.$$

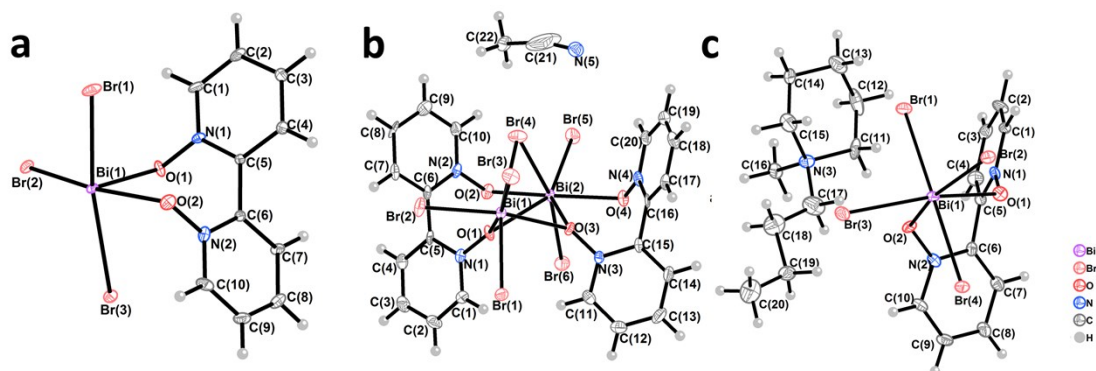**Figure S1** ORTEP drawings (50% ellipsoid probability) of the asymmetric units of **1** (a), **2** (b) and **3** (c).

**Table 2** Selected bond lengths (Å) and bond angles (°) for **1**, **2** and **3**.

| <b>1</b>            |            | <b>2</b>         |            | <b>3</b>          |             |
|---------------------|------------|------------------|------------|-------------------|-------------|
| Bi(1)–O(1)          | 2.272(4)   | Bi(1)–O(1)       | 2.524(4)   | Bi(1)–O(1)        | 2.410(4)    |
| Bi(1)–O(2)          | 2.385(5)   | Bi(1)–O(3)       | 2.710(4)   | Bi(1)–O(2)        | 2.398(4)    |
| Bi(1)–Br(1)         | 2.7085(7)  | Bi(2)–O(1)       | 2.669(4)   | Bi(1)–Br(1)       | 2.8468(6)   |
| Bi(1)–Br(2)         | 2.7859(8)  | Bi(2)–O(2)       | 2.390(4)   | Bi(1)–Br(2)       | 2.8361(7)   |
| Bi(1)–Br(3)         | 3.0061(7)  | Bi(2)–O(3)       | 2.597(4)   | Bi(1)–Br(3)       | 2.8387(7)   |
| Bi(1)–Br(3)#1       | 3.0479(7)  | Bi(2)–O(4)       | 2.409(4)   | Bi(1)–Br(4)       | 2.8003(6)   |
| O(1)–N(1)           | 1.336(7)   | Bi(1)–Br(1)      | 2.7926(11) | O(1)–N(1)         | 1.341(6)    |
| O(2)–N(2)           | 1.333(7)   | Bi(1)–Br(2)      | 2.6619(8)  | O(2)–N(2)         | 1.340(6)    |
| N(1)–C(1)           | 1.341(8)   | Bi(1)–Br(3)      | 2.7065(9)  | N(1)–C(1)         | 1.337(7)    |
| N(1)–C(5)           | 1.352(9)   | Bi(1)–Br(4)      | 2.9295(11) | N(1)–C(5)         | 1.362(8)    |
| N(2)–C(10)          | 1.340(8)   | Bi(2)–Br(4)      | 3.1408(10) | N(2)–C(10)        | 1.355(7)    |
| N(2)–C(6)           | 1.349(8)   | Bi(2)–Br(5)      | 2.7556(10) | N(2)–C(6)         | 1.360(7)    |
|                     |            | Bi(2)–Br(6)      | 2.6497(8)  |                   |             |
| O(1)–Bi(1)–O(2)     | 75.87(15)  | O(1)–Bi(1)–O(3)  | 65.11(13)  | O(2)–Bi(1)–O(1)   | 73.35(14)   |
| O(1)–Bi(1)–Br(1)    | 91.58(11)  | O(2)–Bi(2)–O(1)  | 67.96(12)  | O(1)–Bi(1)–Br(1)  | 90.00(9)    |
| O(1)–Bi(1)–Br(2)    | 86.59(12)  | O(2)–Bi(2)–O(3)  | 132.74(13) | O(1)–Bi(1)–Br(2)  | 87.98(10)   |
| O(1)–Bi(1)–Br(3)    | 81.98(11)  | O(2)–Bi(2)–O(4)  | 156.97(14) | O(1)–Bi(1)–Br(3)  | 161.81(10)  |
| O(1)–Bi(1)–Br(3)#1  | 168.09(12) | O(3)–Bi(2)–O(1)  | 64.78(13)  | O(1)–Bi(1)–Br(4)  | 85.11(9)    |
| O(2)–Bi(1)–Br(1)    | 86.20(10)  | O(4)–Bi(2)–O(1)  | 131.30(13) | O(2)–Bi(1)–Br(1)  | 85.95(10)   |
| O(2)–Bi(1)–Br(2)    | 162.39(10) | O(4)–Bi(2)–O(3)  | 67.90(13)  | O(2)–Bi(1)–Br(2)  | 161.32(10)  |
| O(2)–Bi(1)–Br(3)    | 86.60(10)  | O(1)–Bi(1)–Br(1) | 92.65(8)   | O(2)–Bi(1)–Br(3)  | 88.52(10)   |
| O(2)–Bi(1)–Br(3)#1  | 95.66(10)  | O(1)–Bi(1)–Br(2) | 85.57(9)   | O(2)–Bi(1)–Br(4)  | 86.33(10)   |
| Br(1)–Bi(1)–Br(2)   | 95.95(2)   | O(1)–Bi(1)–Br(3) | 168.88(8)  | Br(2)–Bi(1)–Br(1) | 93.651(19)  |
| Br(1)–Bi(1)–Br(3)   | 171.33(2)  | O(1)–Bi(1)–Br(4) | 77.26(8)   | Br(2)–Bi(1)–Br(3) | 110.164(19) |
|                     |            |                  |            | )                 |             |
| Br(1)–Bi(1)–Br(3)#1 | 96.24(2)   | O(3)–Bi(1)–Br(1) | 88.34(7)   | Br(3)–Bi(1)–Br(1) | 90.10(2)    |
| Br(2)–Bi(1)–Br(3)   | 89.48(2)   | O(3)–Bi(1)–Br(4) | 75.57(7)   | Br(4)–Bi(1)–Br(1) | 171.79(2)   |
| Br(2)–Bi(1)–Br(3)#1 | 101.46(2)  | Br(2)–Bi(1)–O(3) | 150.68(9)  | Br(4)–Bi(1)–Br(2) | 92.767(19)  |
| Br(3)–Bi(1)–Br(3)#1 | 89.264(19) | Br(3)–Bi(1)–O(3) | 116.63(9)  | Br(4)–Bi(1)–Br(3) | 92.489(19)  |
| Bi(1)–Br(3)–Bi(1)#1 | 90.736(19) | O(1)–Bi(2)–Br(4) | 71.59(8)   | N(1)–O(1)–Bi(1)   | 117.1(3)    |
| N(1)–O(1)–Bi(1)     | 120.6(3)   | O(1)–Bi(2)–Br(5) | 146.87(9)  | N(2)–O(2)–Bi(1)   | 120.3(3)    |
| N(2)–O(2)–Bi(1)     | 116.6(3)   | Br(6)–Bi(2)–O(1) | 88.88(8)   |                   |             |
|                     |            | O(2)–Bi(2)–Br(4) | 92.27(9)   |                   |             |
|                     |            | O(2)–Bi(2)–Br(5) | 81.70(9)   |                   |             |
|                     |            | O(2)–Bi(2)–Br(6) | 84.25(9)   |                   |             |
|                     |            | O(3)–Bi(2)–Br(4) | 73.49(8)   |                   |             |
|                     |            | O(3)–Bi(2)–Br(5) | 143.67(9)  |                   |             |
|                     |            | O(3)–Bi(2)–Br(6) | 94.42(9)   |                   |             |
|                     |            | O(4)–Bi(2)–Br(4) | 105.43(10) |                   |             |
|                     |            | O(4)–Bi(2)–Br(5) | 81.46(9)   |                   |             |
|                     |            | O(4)–Bi(2)–Br(6) | 83.81(9)   |                   |             |

---

|                   |            |
|-------------------|------------|
| Br(1)–Bi(1)–Br(4) | 163.47(2)  |
| Br(2)–Bi(1)–Br(1) | 93.24(2)   |
| Br(2)–Bi(1)–Br(3) | 92.12(3)   |
| Br(2)–Bi(1)–Br(4) | 98.92(2)   |
| Br(3)–Bi(1)–Br(1) | 98.34(2)   |
| Br(3)–Bi(1)–Br(4) | 92.39(2)   |
| Br(5)–Bi(2)–Br(4) | 97.59(3)   |
| Br(6)–Bi(2)–Br(4) | 159.95(2)  |
| Br(6)–Bi(2)–Br(5) | 101.42(3)  |
| Bi(1)–Br(4)–Bi(2) | 83.94(2)   |
| Bi(1)–O(1)–Bi(2)  | 102.92(13) |
| Bi(2)–O(3)–Bi(1)  | 99.88(13)  |
| N(1)–O(1)–Bi(1)   | 132.1(3)   |
| N(1)–O(1)–Bi(2)   | 125.0(3)   |
| N(2)–O(2)–Bi(2)   | 116.0(3)   |
| N(3)–O(3)–Bi(1)   | 135.1(3)   |
| N(3)–O(3)–Bi(2)   | 120.3(3)   |
| N(4)–O(4)–Bi(2)   | 117.0(3)   |

Symmetry transformations used to generate equivalent atoms: #1  $-x, -y+1, -z+1$ ;

---

**Table 3** Hydrogen bonding data for **1**, **2** and **3**.

| D–H···A                                                                                                                                                                                            | D–H (Å) | H···A (Å) | D···A (Å) | <(DHA) (°) |
|----------------------------------------------------------------------------------------------------------------------------------------------------------------------------------------------------|---------|-----------|-----------|------------|
| <b>1</b>                                                                                                                                                                                           |         |           |           |            |
| C(1)–H(1)···Br(1)#2                                                                                                                                                                                | 0.95    | 2.99      | 3.920(8)  | 167.6      |
| C(2)–H(2)···Br(2)#2                                                                                                                                                                                | 0.95    | 2.96      | 3.613(7)  | 127.4      |
| C(7)–H(7)···Br(2)#3                                                                                                                                                                                | 0.95    | 3.01      | 3.717(7)  | 131.9      |
| C(10)–H(10)···Br(2)#1                                                                                                                                                                              | 0.95    | 2.94      | 3.841(7)  | 158.1      |
| Symmetry transformations used to generate equivalent atoms:<br>#1 $-x, -y+1, -z+1$ ; #2 $-x+1, -y, -z+2$ ; #3 $-x+1, -y+1, -z+1$ .                                                                 |         |           |           |            |
| <b>2</b>                                                                                                                                                                                           |         |           |           |            |
| C(1)–H(1)···Br(1)#1                                                                                                                                                                                | 0.95    | 2.89      | 3.635(6)  | 136.4      |
| C(4)–H(4)···Br(5)#2                                                                                                                                                                                | 0.95    | 3.06      | 3.885(6)  | 146.6      |
| C(7)–H(7)···Br(3)#3                                                                                                                                                                                | 0.95    | 3.09      | 3.963(6)  | 153.1      |
| C(11)–H(11)···Br(1)                                                                                                                                                                                | 0.95    | 3.13      | 3.669(6)  | 117.9      |
| C(11)–H(11)···Br(1)#1                                                                                                                                                                              | 0.95    | 2.99      | 3.671(6)  | 129.7      |
| C(12)–H(12)···Br(1)#1                                                                                                                                                                              | 0.95    | 3.12      | 3.733(7)  | 124.1      |
| C(12)–H(12)···Br(2)#4                                                                                                                                                                              | 0.95    | 3.11      | 3.962(6)  | 150.8      |
| C(17)–H(17)···Br(1)#5                                                                                                                                                                              | 0.95    | 3.02      | 3.713(6)  | 130.9      |
| C(17)–H(17)···Br(2)#5                                                                                                                                                                              | 0.95    | 3.10      | 3.738(6)  | 125.6      |
| Symmetry transformations used to generate equivalent atoms:<br>#1 $-x+1, y, -z+1/2$ ; #2 $-x+3/2, -y+1/2, -z+1$ ; #3 $-x+3/2, y-1/2, -z+1/2$ . #4 $x-1/2, y+1/2, z$ ; #5 $-x+3/2, y+1/2, -z+1/2$ . |         |           |           |            |
| <b>3</b>                                                                                                                                                                                           |         |           |           |            |

---

| <b>H-bond in anions</b>                   |      |      |          |       |
|-------------------------------------------|------|------|----------|-------|
| C(1)–H(1)···Br(1)#1                       | 0.95 | 2.98 | 3.691(6) | 133.2 |
| C(2)–H(2)···Br(2)#1                       | 0.95 | 2.98 | 3.855(6) | 154.6 |
| C(7)–H(7)···Br(2)#2                       | 0.95 | 2.89 | 3.693(6) | 143.2 |
| C(9)–H(9)···Br(3)#3                       | 0.95 | 2.98 | 3.837(6) | 151.5 |
| C(9)–H(9)···Br(4)#3                       | 0.95 | 3.13 | 3.730(6) | 122.6 |
| <b>H-bonds between anions and cations</b> |      |      |          |       |
| C(11)–H(11A)···Br(3)#4                    | 0.99 | 2.78 | 3.746(6) | 164.3 |
| C(11)–H(11B)···Br(1)                      | 0.99 | 3.07 | 3.964(7) | 150.8 |
| C(12)–H(12B)···Br(2)#4                    | 0.99 | 2.88 | 3.853(7) | 167.3 |
| C(14)–H(14A)···Br(2)#5                    | 0.99 | 3.12 | 3.717(7) | 119.9 |
| C(16)–H(16A)···Br(2)#4                    | 0.98 | 3.04 | 3.794(6) | 135.1 |
| C(16)–H(16B)···Br(4)#5                    | 0.98 | 2.98 | 3.943(6) | 169.5 |
| C(16)–H(16C)···Br(3)#4                    | 0.98 | 3.11 | 3.971(7) | 148.0 |
| C(18)–H(18A)···Br(4)#5                    | 0.99 | 3.00 | 3.822(8) | 141.7 |
| C(14)–H(14B)···O(1)#5                     | 0.99 | 2.48 | 3.370(8) | 149.1 |
| C(17)–H(17B)···O(2)                       | 0.99 | 2.22 | 3.052(9) | 141.0 |

Symmetry transformations used to generate equivalent atoms:  
#1 -x+2, -y+1, -z+1; #2 x, -y+3/2, z+1/2; #3 -x+1, -y+1, -z+1; #4 x, -y+1/2, z+1/2; #5 x, y-1, z.

**Table 4.** Selected anion··· $\pi$  interaction data for **1**.

| Y–X(I)···Cg(J)      | ARU(J)  | X···Cg(Å) | <Y–X···Cg(°) | Y···Cg(Å) | Y–X, Pi |
|---------------------|---------|-----------|--------------|-----------|---------|
| Bi(1)–Br(1)···Cg(3) | 2656.01 | 3.588(3)  | 128.87(5)    | 5.693(3)  | 29.92   |

Cg(3): N(2)→C(6)→C(7)→C(8)→C(9)→C(10). [2656] = 1-x, -y, 1-z.

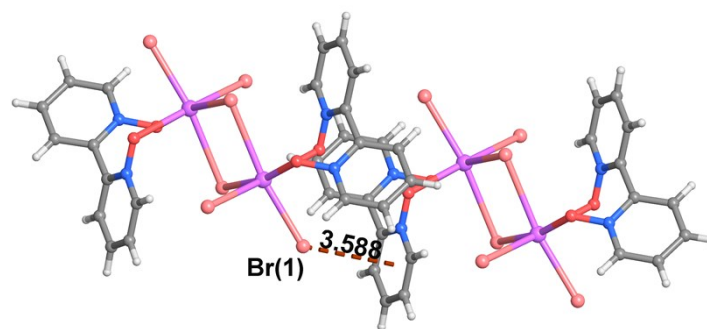

**Figure S2** The view of anion··· $\pi$  interaction (brown dotted line) for **1**.

**Table 5.** Selected anion $\cdots\pi$  interaction data for **2**.

| Y-X(I) $\cdots$ Cg(J)           | ARU(J)  | X $\cdots$ Cg(Å) | <Y-X $\cdots$ Cg(°) | Y $\cdots$ Cg(Å) | Y-X, Pi |
|---------------------------------|---------|------------------|---------------------|------------------|---------|
| Bi(1)-Br(2) $\rightarrow$ Cg(3) | 6645.01 | 3.912(2)         | 116.14(5)           | 5.618(3)         | 30.36   |
| Bi(1)-Br(3) $\rightarrow$ Cg(1) | 6655.01 | 3.807(3)         | 149.60(5)           | 6.292(3)         | 63.12   |
| Bi(2)-Br(5) $\rightarrow$ Cg(2) | 7656.01 | 3.774(3)         | 101.57(5)           | 5.100(3)         | 23.29   |
| Bi(2)-Br(5) $\rightarrow$ Cg(4) | 7666.01 | 3.609(3)         | 104.12(5)           | 5.046(3)         | 20.50   |

Cg(1): N(1) $\rightarrow$ C(1) $\rightarrow$ C(2) $\rightarrow$ C(3) $\rightarrow$ C(4) $\rightarrow$ C(5). Cg(2): N(2) $\rightarrow$ C(6) $\rightarrow$ C(7) $\rightarrow$ C(8) $\rightarrow$ C(9) $\rightarrow$ C(10).

Cg(3): N(3) $\rightarrow$ C(11) $\rightarrow$ C(12) $\rightarrow$ C(13) $\rightarrow$ C(14) $\rightarrow$ C(15). Cg(4):

N(4) $\rightarrow$ C(16) $\rightarrow$ C(17) $\rightarrow$ C(18) $\rightarrow$ C(19) $\rightarrow$ C(20). [6645] = 3/2-x, -1/2+y, 1/2-z. [6655] = 3/2-x, 1/2+y,

1/2-z. [7656] = 3/2-x, 1/2-y, 1-z. [7666] = 3/2-x, 3/2-y, 1-z.

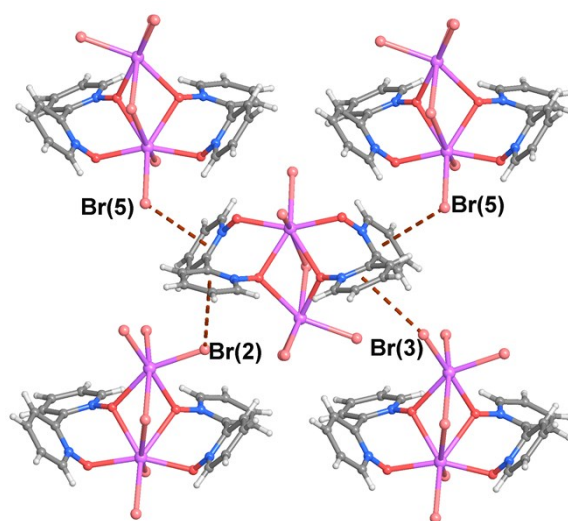**Figure S3** The view of anion $\cdots\pi$  interactions (brown dotted line) for **2**.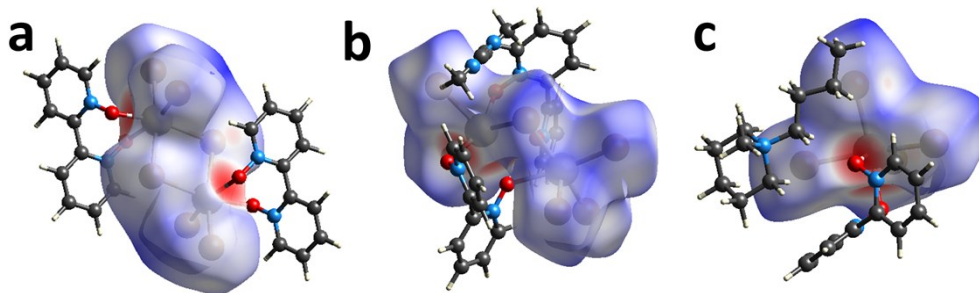**Figure S4** The Hirshfeld  $d_{\text{norm}}$  surfaces of inorganic part with all interactions for **1** (a) **2** (b) and **3** (c). The highlights in red represent closer distances and stronger interactions while white and blue highlights refer to longer distances and weak interactions.

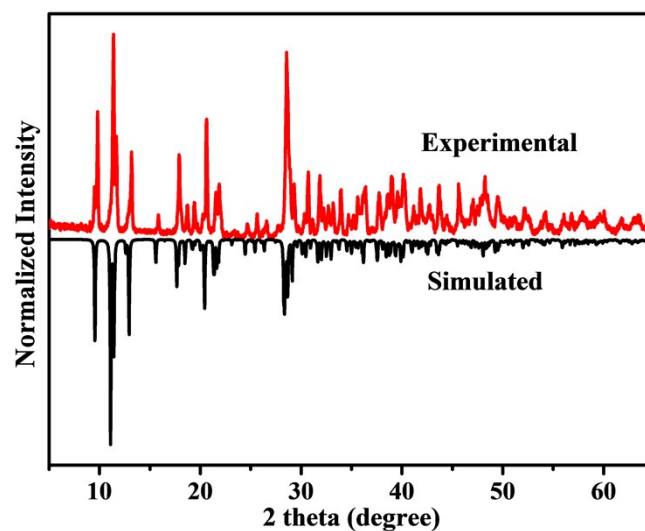

**Figure S5** PXRd patterns of 1. The simulated pattern was obtained from the single-crystal X-ray data collected at 290 K.

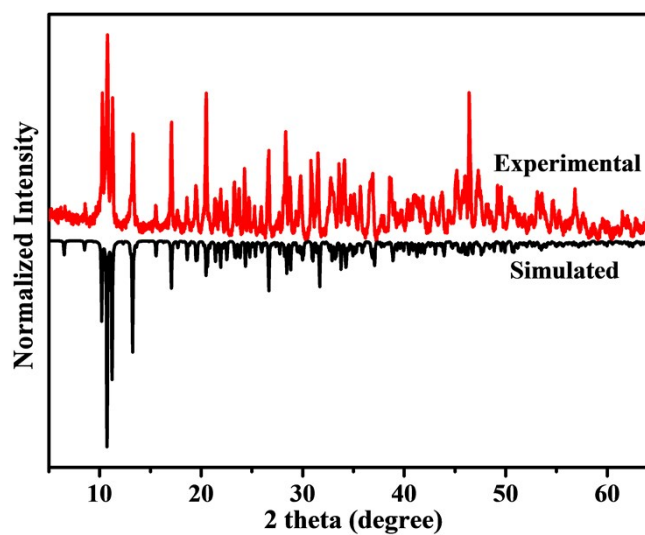

**Figure S6** PXRd patterns of 2.

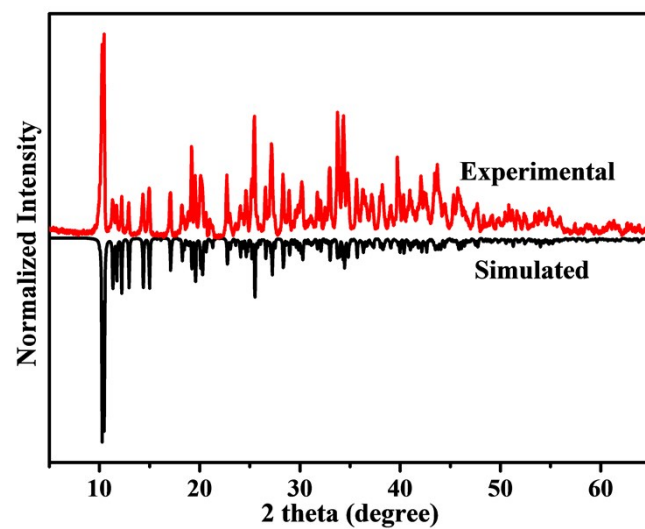

**Figure S7** PXRd patterns of 3. The simulated pattern was obtained from the single-crystal X-ray data collected at 290 K.

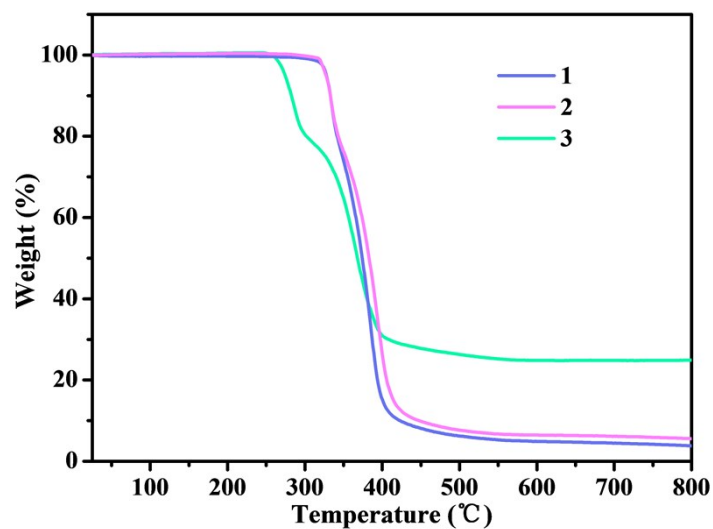

Figure S8 TG curves of 1, 2 and 3.

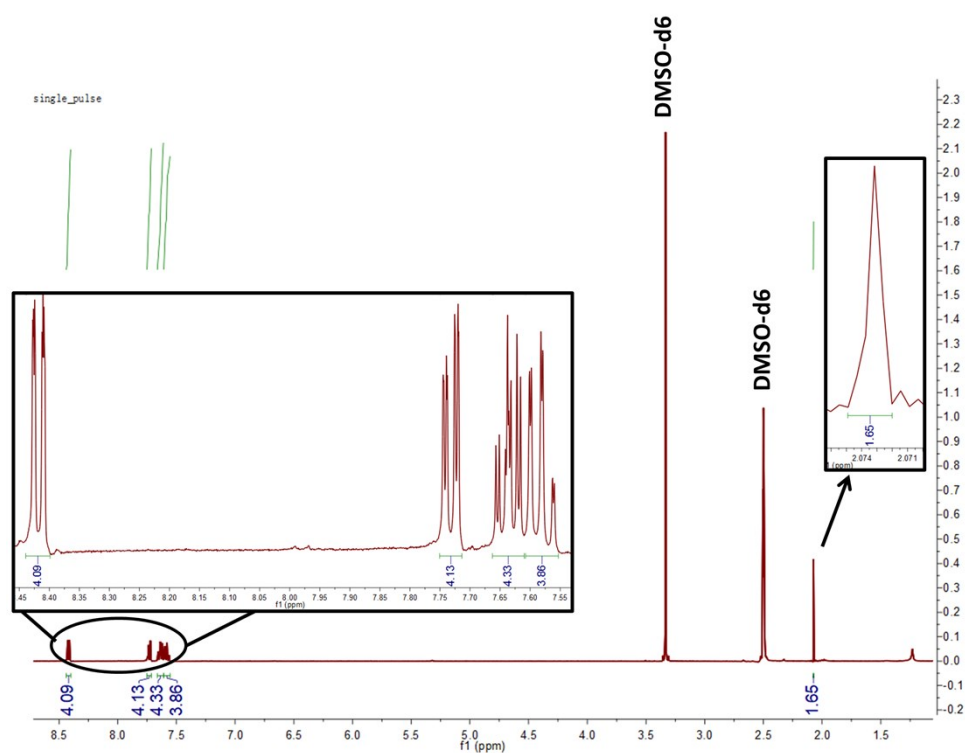

Figure S9  $^1\text{H}$  NMR spectrum of 2. Inset: the amplification spectra of peaks. The peak of hydrogens on acetonitrile solvent molecule is at 2.07 ppm while the peaks of hydrogens on bp2do ligand are 8.43, 7.73, 7.65 and 7.60 ppm.



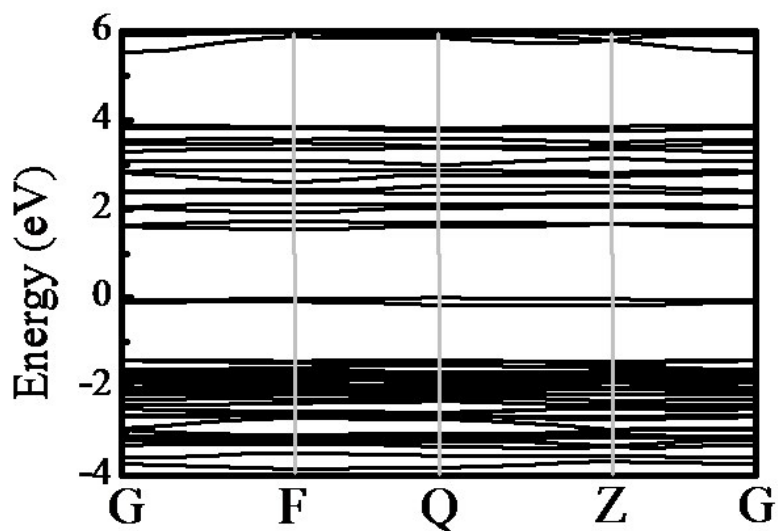

Figure S10 The electronic band structure of **1**. The calculated bandgap is 1.536 eV.

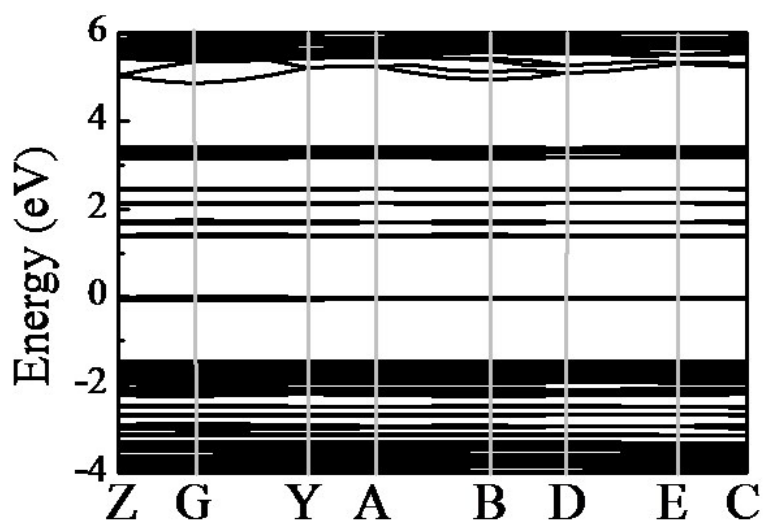

Figure S11 The electronic band structure of **3**. The calculated bandgap is 1.355 eV.

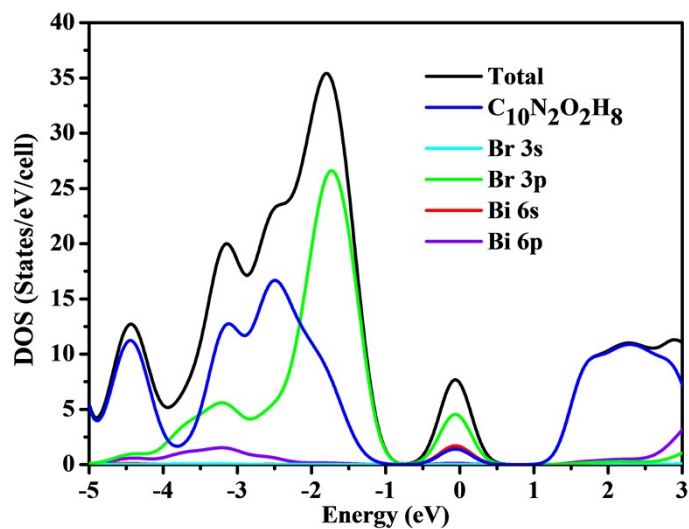

Figure S12 Density of states (DOSs) for **1**. The  $C_{10}N_2O_2H_8$  represents the bp2do organic ligand.

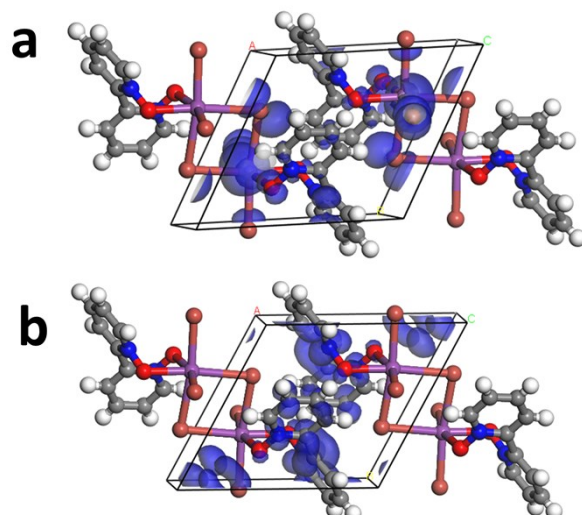

**Figure S13** The molecular orbitals of **1** of the highest occupied molecular orbital (a, HOMO) and the lowest unoccupied molecular orbital (b, LUMO). The isosurface value is 0.02.

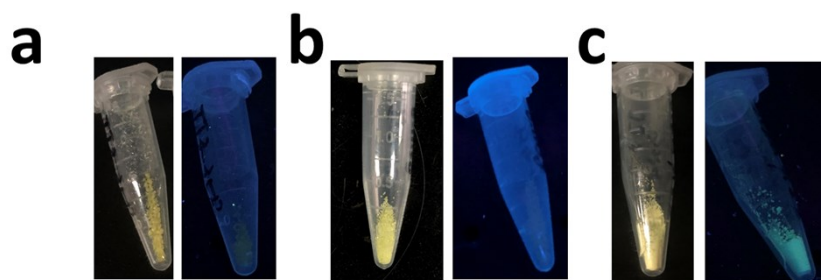

**Figure S14** Photographs of **1** under daylight (left) and UV light (right). (b) Photographs of **2** under daylight (left) and UV light (right). (c) Photographs of **3** under daylight (left) and UV light (right).

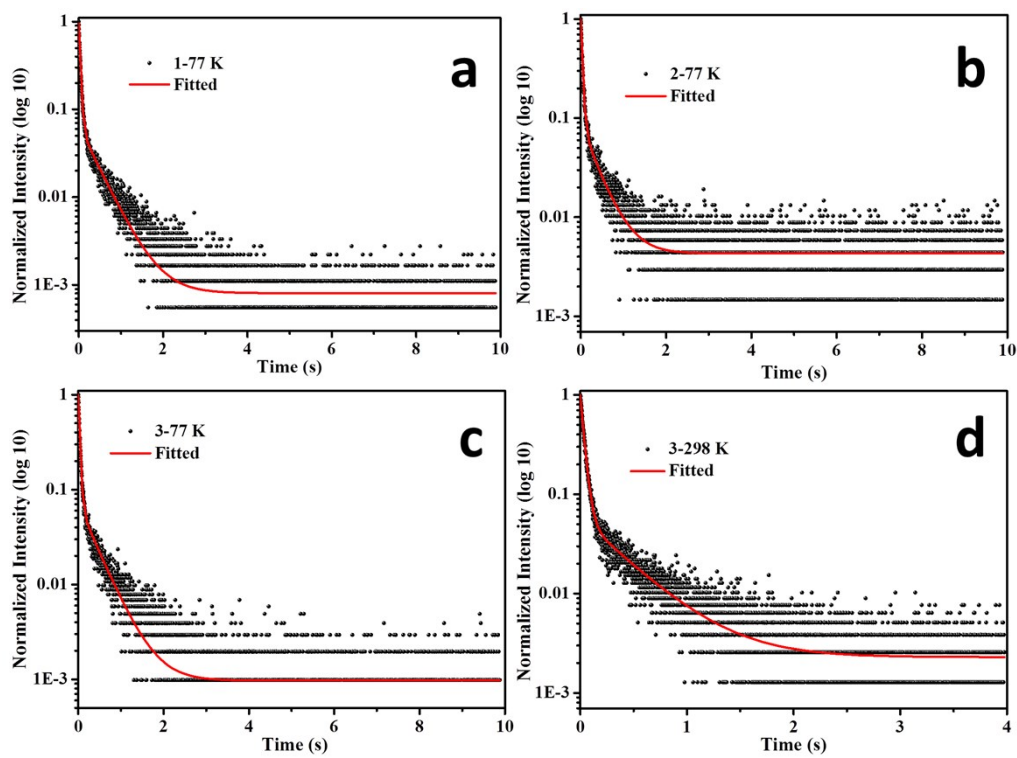

**Figure S15** Fitted photoluminescence (PL) decay spectra of **1** (a) and **2** (b) at 77 K, and **3** at 77 K (c) and 298 K (d). The fitted lines are set in red solid line.
